# Supplementary material for: Spatial Distribution of Calcium-Gated Chloride Channels in Olfactory Cilia
Source: PubMed Central journal article supplement (PMC3012700; doi:10.1371/journal.pone.0015676), 2010-12-30
Supplement: pone.0015676.s001.pdf [file pone.0015676.s001.pdf]

**Table S1: Compositions of pseudointracellular solutions**

| <b>buffer</b> | <b>[buffer]<sub>total</sub><br/>(mM)</b> | <b>[Ca<sup>2+</sup>]<sub>total</sub><br/>(mM)</b> | <b>[Ca<sup>2+</sup>]<sub>free</sub><br/>(<math>\mu</math>M)</b> | <b>Figures</b>        |
|---------------|------------------------------------------|---------------------------------------------------|-----------------------------------------------------------------|-----------------------|
| BAPTA         | 2.0                                      | <0.01                                             | <0.1                                                            | –                     |
| BAPTA         | 0.2                                      | 0.50                                              | 300                                                             | 4B                    |
| BAPTA         | 0.6                                      | 0.90                                              | 300                                                             | 4B                    |
| BAPTA         | 2.0                                      | 2.30                                              | 300                                                             | 2, 4B, 4C, S1, S2, S3 |
| dibromoBAPTA  | 2.0                                      | 2.30                                              | 300                                                             | 4C                    |
| HEDTA         | 2.0                                      | 0.65                                              | 7                                                               | 4A                    |
| HEDTA         | 2.0                                      | 1.17                                              | 20                                                              | 4A                    |
| HEDTA         | 2.0                                      | 2.21                                              | 300                                                             | 4A, 4C                |
